# Supplementary material for: New Estimates of Incidence of Encephalitis in England
Source: PubMed Central journal article supplement (PMC3810913; doi:10.3201/eid1909.130064), 2013-09
Supplement: 13-0064-Techapp-s1.pdf [file 13-0064-Techapp-s1.pdf]

# High Estimated Incidence of Encephalitis in England

## Technical Appendix

Technical Appendix Table 1. Hospital Episode Statistics codes for identifying encephalitis and etiological groupings\*

| Infection type                                                                                                                                  | Codes                                                                         |
|-------------------------------------------------------------------------------------------------------------------------------------------------|-------------------------------------------------------------------------------|
| <b>Viral</b>                                                                                                                                    |                                                                               |
| Herpes simplex virus                                                                                                                            | B004                                                                          |
| Varicella-zoster virus                                                                                                                          | B011, B020                                                                    |
| Enterovirus                                                                                                                                     | A850                                                                          |
| Adenovirus                                                                                                                                      | A851                                                                          |
| Measles                                                                                                                                         | B050                                                                          |
| Mumps                                                                                                                                           | B262                                                                          |
| Rabies                                                                                                                                          | A820 A821 A829                                                                |
| Arboviruses                                                                                                                                     | A830 A831 A832 A833 A834 A835 A836 A922<br>A838 A839 A852 A840 A841 A848 A849 |
| Rubella                                                                                                                                         | B060 <u>AND</u> G051                                                          |
| Influenza                                                                                                                                       | J108/J118 <u>AND</u> G051                                                     |
| Polio                                                                                                                                           | A800/A801/A802/A803/A804/A809 <u>AND</u> G051                                 |
| Lymphocytic choriomeningitis virus                                                                                                              | A872 <u>AND</u> G051                                                          |
| Cytomegalovirus                                                                                                                                 | B258 <u>AND</u> G051                                                          |
| HIV                                                                                                                                             | B220 <u>AND</u> G051                                                          |
| Progressive multifocal leukoencephalopathy                                                                                                      | A812                                                                          |
| Other specified viral encephalitis (encephalitis lethargica, Von Economo-Crucchet disease)                                                      | A858                                                                          |
| Subacute sclerosing panencephalitis                                                                                                             | A811                                                                          |
| <b>Bacterial</b>                                                                                                                                |                                                                               |
| Listeria                                                                                                                                        | A321 <u>AND</u> G050                                                          |
| Meningococcal infection                                                                                                                         | A398 <u>AND</u> G050                                                          |
| Syphilis                                                                                                                                        | A504/A521 <u>AND</u> G050                                                     |
| Tuberculosis                                                                                                                                    | A178 <u>AND</u> G050                                                          |
| Streptococcal infection                                                                                                                         | A491 <u>AND</u> G050                                                          |
| Lyme disease                                                                                                                                    | A692 <u>AND</u> G050                                                          |
| Cat-scratch disease                                                                                                                             | A281 <u>AND</u> G050                                                          |
| Actinomycosis                                                                                                                                   | A428 <u>AND</u> G050                                                          |
| Bacterial meningoencephalitis and meningomyelitis, not elsewhere classified                                                                     | G042                                                                          |
| <b>Parasitic</b>                                                                                                                                |                                                                               |
| Trypanosomiasis                                                                                                                                 | B560 B561 B569 B574                                                           |
| Toxoplasma                                                                                                                                      | B582                                                                          |
| Amoebic                                                                                                                                         |                                                                               |
| Naegleriasis (primary amoebic meningoencephalitis)                                                                                              | B602                                                                          |
| Angiostrongyliasis due to <i>Parastrongylus cantonensis</i> (eosinophilic meningoencephalitis)                                                  | B832                                                                          |
| <b>Fungal</b>                                                                                                                                   |                                                                               |
| Cryptococcosis                                                                                                                                  | B451 <u>AND</u> G052                                                          |
| Immune-mediated                                                                                                                                 |                                                                               |
| Acute disseminated encephalomyelitis                                                                                                            | G040                                                                          |
| Acute and subacute haemorrhagic leukoencephalitis                                                                                               | G361                                                                          |
| Systemic lupus erythematosus                                                                                                                    | M321 <u>AND</u> G058                                                          |
| Paraneoplastic limbic encephalopathy                                                                                                            | G131                                                                          |
| Myxoedema coma                                                                                                                                  |                                                                               |
| Unknown                                                                                                                                         |                                                                               |
| Unspecified viral encephalitis                                                                                                                  | A86; G050 G051 G052 G058 IF no other code specified                           |
| Encephalitis, myelitis, and encephalomyelitis, unspecified—ventriculitis (cerebral) not otherwise specified                                     | G049                                                                          |
| Other (includes other encephalitis, myelitis and encephalomyelitis, postinfectious encephalitis, and encephalomyelitis not otherwise specified) | G048                                                                          |

Technical Appendix Table 2. Main effects negative binomial regression model assessing variation in incident encephalitis admissions by year, sex, age, and region, England, April 2005–February 2009\*

| Level                    | No. (%) incident admissions, n = 8,848 | Crude incidence per 100,000 population/year | Multivariable |           |         |
|--------------------------|----------------------------------------|---------------------------------------------|---------------|-----------|---------|
|                          |                                        |                                             | Adjusted IRR  | 95% CI    | p value |
| <b>Year</b>              |                                        |                                             |               |           |         |
| 2005–6                   | 1,991 (22)                             | 3.89 (3.40–4.44)                            | 1.00          | –         | 0.002   |
| 2006–7                   | 2,304 (26)                             | 4.5 (3.97–5.14)                             | 1.15          | 1.07–1.24 |         |
| 2007–8                   | 2,176 (25)                             | 4.27 (3.69–4.82)                            | 1.09          | 1.02–1.18 |         |
| 2008–9                   | 2,369 (27)                             | 4.63 (3.86–5.48)                            | 1.07          | 1.00–1.15 |         |
| Missing                  | 8 (0.1)                                |                                             |               |           |         |
| <b>Sex</b>               |                                        |                                             |               |           |         |
| Male                     | 4,525 (51)                             | 4.50 (3.93–5.14)                            | 1.00          | –         | 0.002   |
| Female                   | 4,322 (49)                             | 4.15 (3.61–4.75)                            | 0.92          | 0.88–0.97 |         |
| Missing                  | 1 (0.0001)                             |                                             |               |           |         |
| <b>Age group</b>         |                                        |                                             |               |           |         |
| <1                       | 300 (3)                                | 11.63 (9.75–13.89)                          | 3.66          | 3.22–4.17 | <0.001  |
| 1–4                      | 581 (7)                                | 6.06 (5.14–7.13)                            | 1.89          | 1.71–2.09 |         |
| 5–19                     | 1,077 (13)                             | 2.86 (2.43–3.39)                            | 0.91          | 0.84–0.99 |         |
| 20–44                    | 2,326 (27)                             | 3.23 (2.78–3.80)                            | 1.00          | –         |         |
| 45–64                    | 2,259 (26)                             | 4.46 (3.86–5.08)                            | 1.41          | 1.31–1.51 |         |
| ≥65                      | 1,973 (23)                             | 6.06 (5.28–6.75)                            | 1.94          | 1.80–2.08 |         |
| Missing                  | 332 (4)                                |                                             |               |           |         |
| <b>Region</b>            |                                        |                                             |               |           |         |
| North West               | 1,222 (14)                             | 4.33 (2.64–6.49)                            | 1.00          | –         | <0.001  |
| South West               | 879 (10)                               | 4.22 (2.66–6.10)                            | 0.93          | 0.84–1.03 |         |
| London                   | 1,692 (19)                             | 5.51 (3.93–7.61)                            | 1.22          | 1.11–1.34 |         |
| North East               | 413 (4)                                | 3.93 (1.97–6.32)                            | 0.92          | 0.82–1.05 |         |
| South East               | 1,272 (15)                             | 3.76 (2.61–5.29)                            | 0.87          | 0.79–0.95 |         |
| West Midlands            | 822 (9)                                | 3.78 (2.61–5.18)                            | 0.87          | 0.78–0.97 |         |
| East Midlands            | 710 (8)                                | 3.99 (2.20–6.28)                            | 0.90          | 0.81–1.01 |         |
| East of England          | 817 (9)                                | 3.50 (2.30–5.22)                            | 0.80          | 0.72–0.89 |         |
| Yorkshire and the Humber | 873 (10)                               | 4.18 (2.75–6.18)                            | 0.84          | 0.76–0.93 |         |
| Missing                  | 126 (1)                                |                                             |               |           |         |

\*IRR, incidence rate ratio; HSV, herpes simplex virus; VZV, varicella-zoster virus.

Technical Appendix Table 3. Comparison of the aetiological classification of the 59 cases that matched between HES and the HPA study\*

| HPA diagnosis         | HES diagnosis |          |               |           |           |          |          |                 |           |             |           |
|-----------------------|---------------|----------|---------------|-----------|-----------|----------|----------|-----------------|-----------|-------------|-----------|
|                       | HSV           | VZV      | Other viruses | Bacterial | Parasitic | Amoebic  | Fungal   | Immune-mediated | Unknown   | Other mixed | Total     |
| HSV                   | 13            | 1        | 0             | 0         | 0         | 0        | 0        | 0               | 2         | 0           | 16        |
| VZV                   | 0             | 2        | 0             | 0         | 0         | 0        | 0        | 0               | 0         | 0           | 2         |
| Other specified viral | 0             | 0        | 2             | 0         | 0         | 0        | 0        | 0               | 1         | 0           | 3         |
| Bacterial             | 0             | 0        | 0             | 2         | 0         | 0        | 0        | 0               | 1         | 0           | 3         |
| Parasitic             | 0             | 0        | 0             | 0         | 0         | 0        | 0        | 0               | 0         | 0           | 0         |
| Amoebic               | 0             | 0        | 0             | 0         | 0         | 0        | 0        | 0               | 0         | 0           | 0         |
| Fungal                | 0             | 0        | 0             | 0         | 0         | 0        | 0        | 0               | 0         | 0           | 0         |
| Immune-mediated       | 0             | 0        | 0             | 0         | 0         | 0        | 0        | 8               | 8         | 2           | 18        |
| Unknown               | 2             | 0        | 3             | 2         | 0         | 0        | 0        | 0               | 8         | 1           | 16        |
| Other mixed           | 0             | 0        | 0             | 0         | 0         | 0        | 0        | 0               | 1         | 0           | 1         |
| <b>Total</b>          | <b>15</b>     | <b>3</b> | <b>5</b>      | <b>4</b>  | <b>0</b>  | <b>0</b> | <b>0</b> | <b>8</b>        | <b>21</b> | <b>3</b>    | <b>59</b> |

\*HES, Hospital Episode Statistics; HPA, Health Protection Authority; HSV, herpes simplex virus; VZV, varicella-zoster virus.
